# Supplementary material
Source: publisher figshare collection journal article supplement (https://acs.figshare.com/ndownloader/files/15280640)
Supplement: Supplementary file 1 [file 15280640]

# **Can Oral Bacteria and Mechanical Fatigue Degrade Zirconia Dental Implants In Vitro?**

Danyal A. Siddiqui<sup>1</sup>, Sathyanarayanan Sridhar<sup>1</sup>, Frederick Wang<sup>1</sup>, Joel J. Jacob<sup>2</sup>, Danieli C. Rodrigues<sup>1\*</sup>

<sup>1</sup>Department of Bioengineering, The University of Texas at Dallas, 800 W. Campbell Road, Richardson, TX, 75080

<sup>2</sup>Department of Biological Sciences, The University of Texas at Dallas, 800 W. Campbell Road, Richardson, TX, 75080

\*Corresponding Author: [danieli@utdallas.edu](mailto:danieli@utdallas.edu)

Number of pages: 7

Number of figures: 6

Number of tables: 0

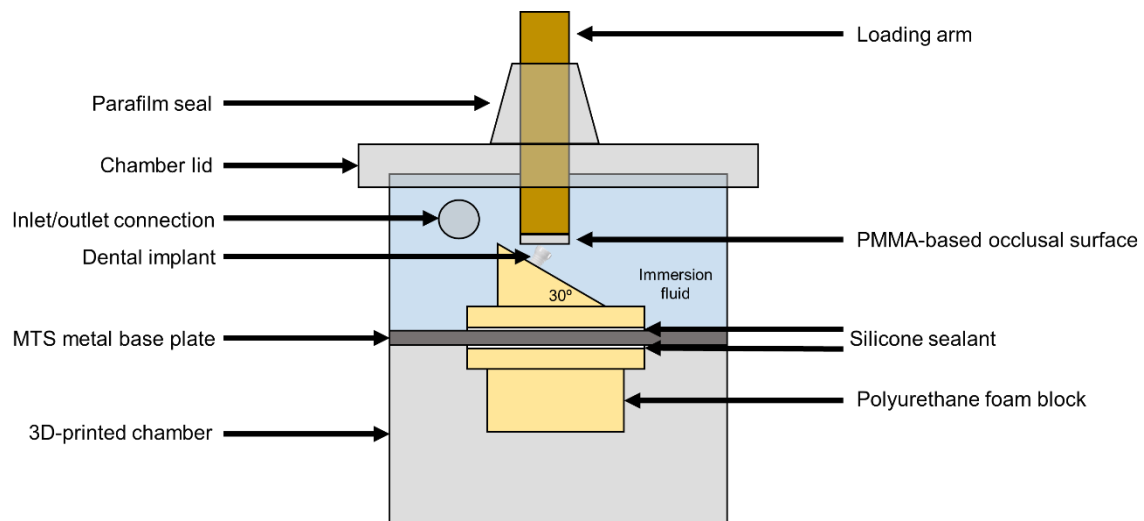

Figure S1. Schematic of test fixture and 3D-printed chamber used for fatigue testing of implants in the synergistic test group (SYN-NC, SYN-PC, SYN-1, SYN-2, SYN-3). Note: dimensions not necessarily drawn to scale.

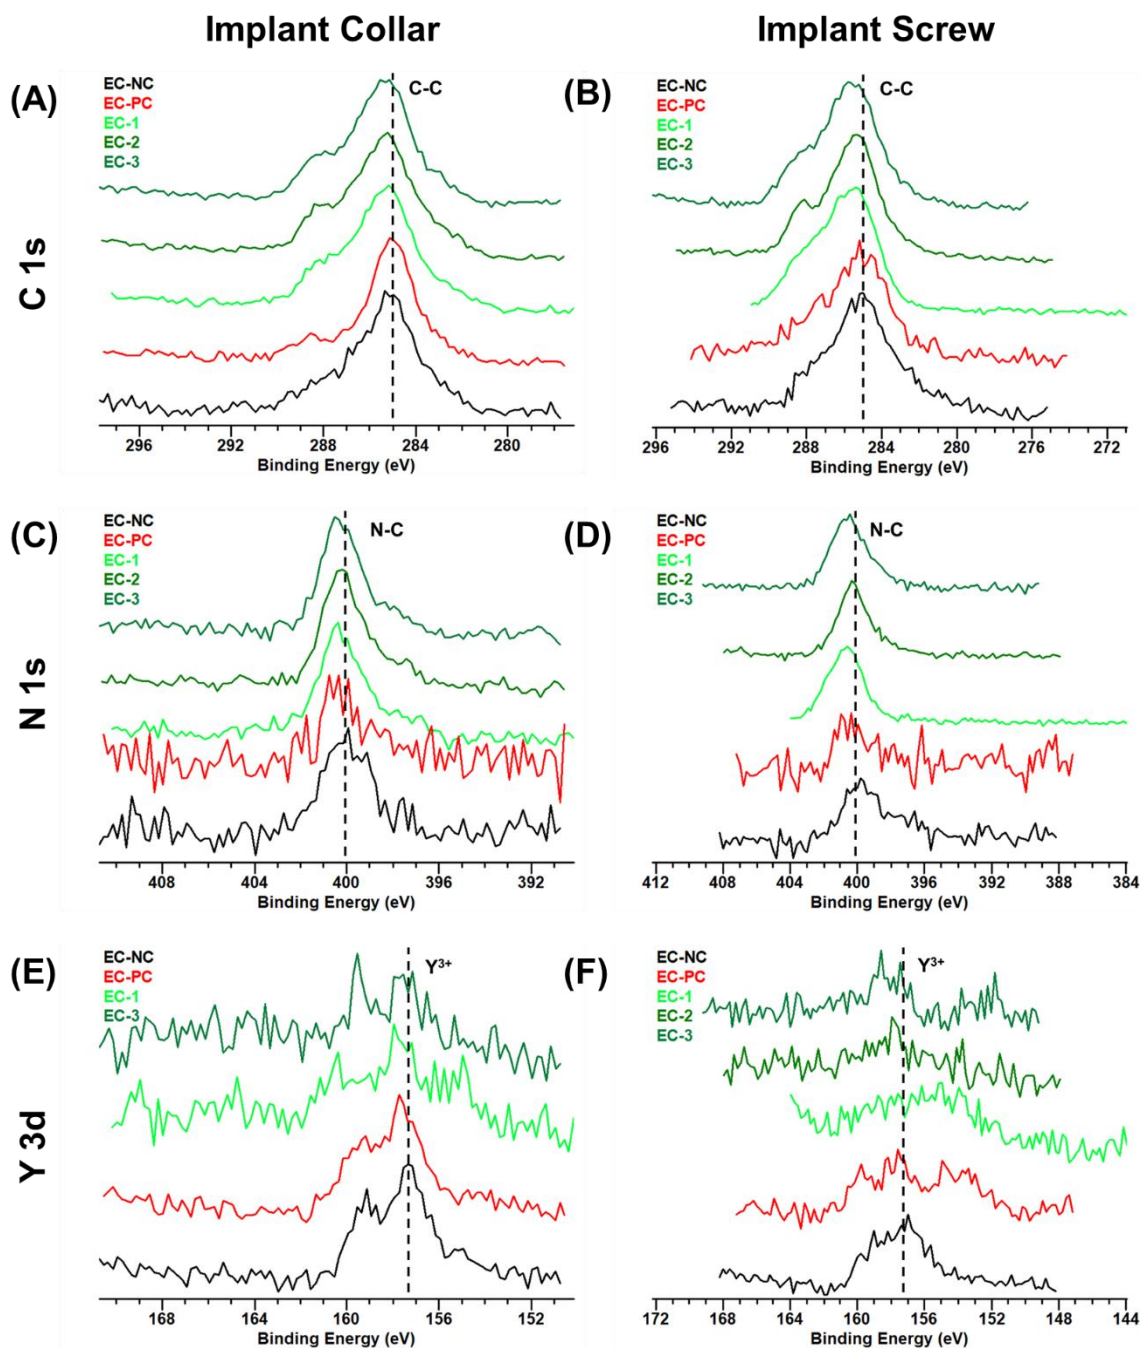

Figure S2. XPS spectra of carbon (C), nitrogen (N), and yttrium (Y) on the surface of ZrO<sub>2</sub> dental implant (A, C, E) collar and (B, D, F) screw regions after 30-day immersion in control or early-colonizing *Streptococcus* polyculture under 5% CO<sub>2</sub> atmosphere at 37 °C.

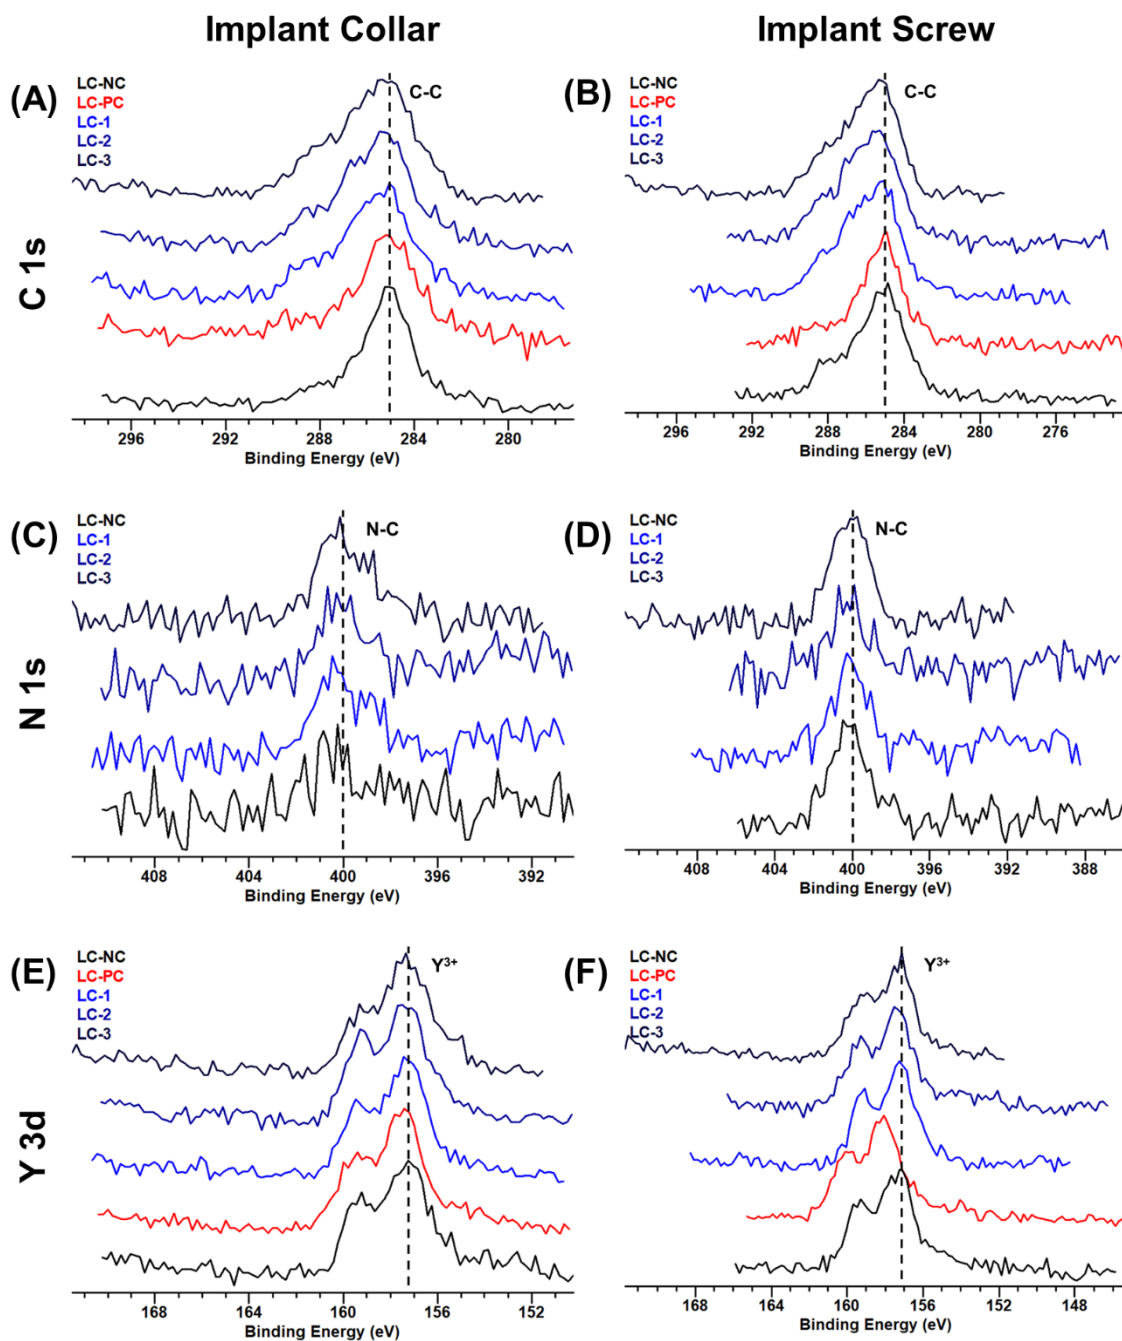

Figure S3. XPS spectra of carbon (C), nitrogen (N), and yttrium (Y) on the surface of ZrO<sub>2</sub> dental implant (A, C, E) collar and (B, D, F) screw regions after 30-day immersion in control or late-colonizing polyculture of *P. gingivalis* and *A. actinomycetemcomitans* under anaerobic conditions at 37 °C.

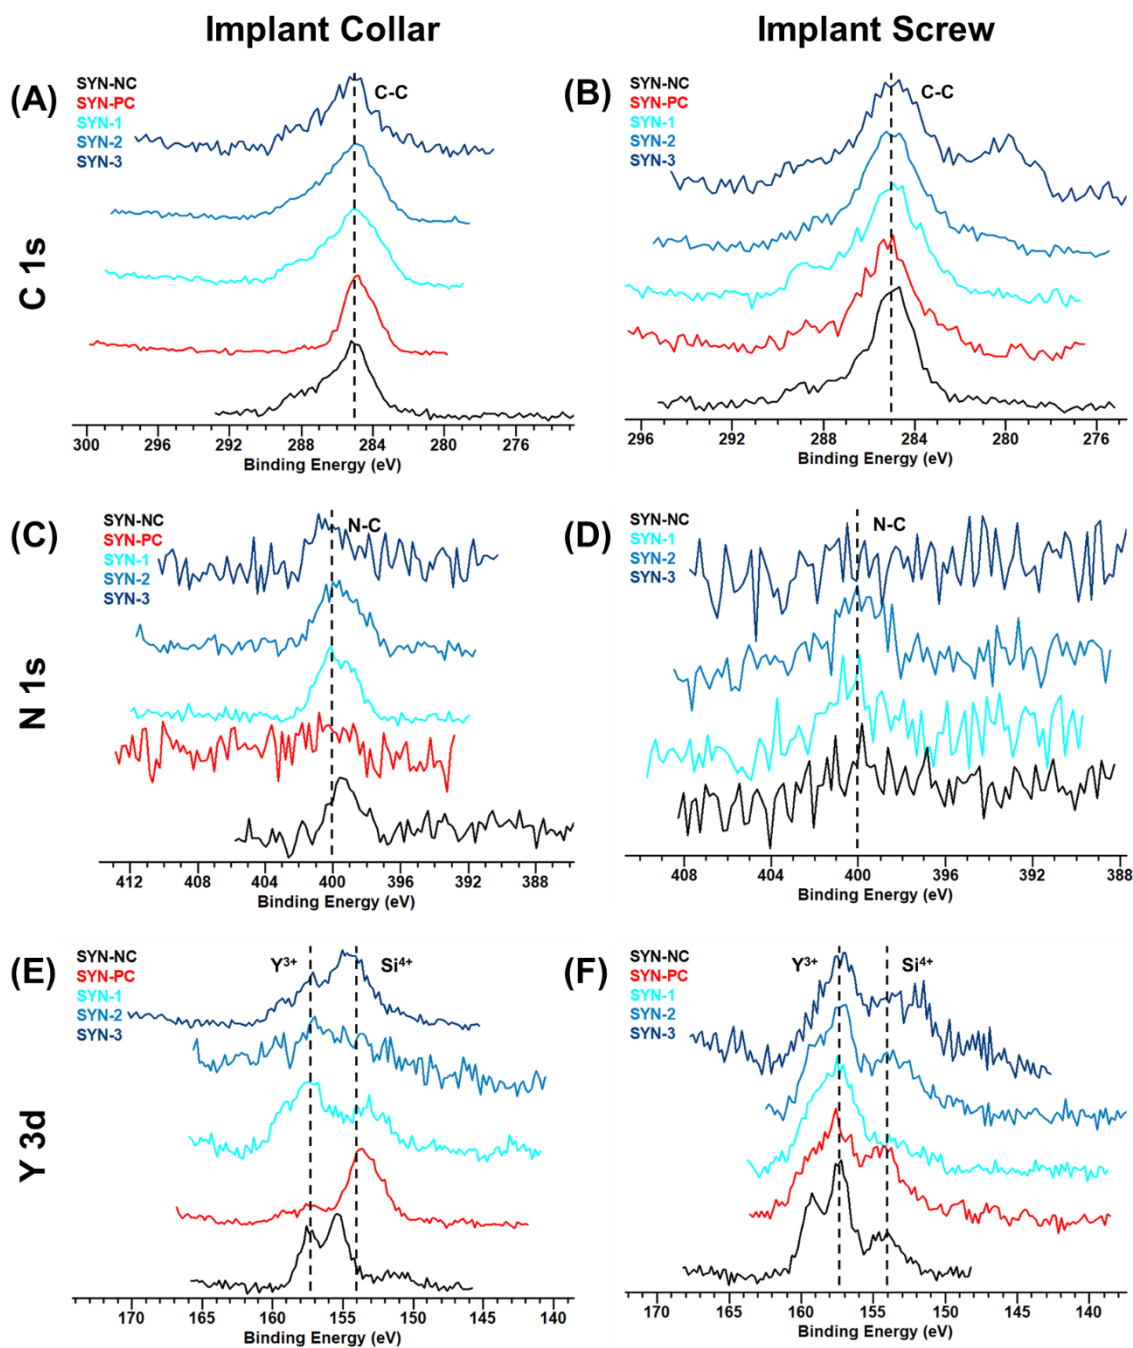

Figure S4. XPS spectra of carbon (C), nitrogen (N), and yttrium (Y) on the surface of ZrO<sub>2</sub> dental implant (A, C, E) collar and (B, D, E) screw regions after immersion in control or polyculture of *Streptococcus* species and *A. actinomycetemcomitans* while subjected to 2 million loading cycles at 4 Hz under ambient air conditions at 37 °C.

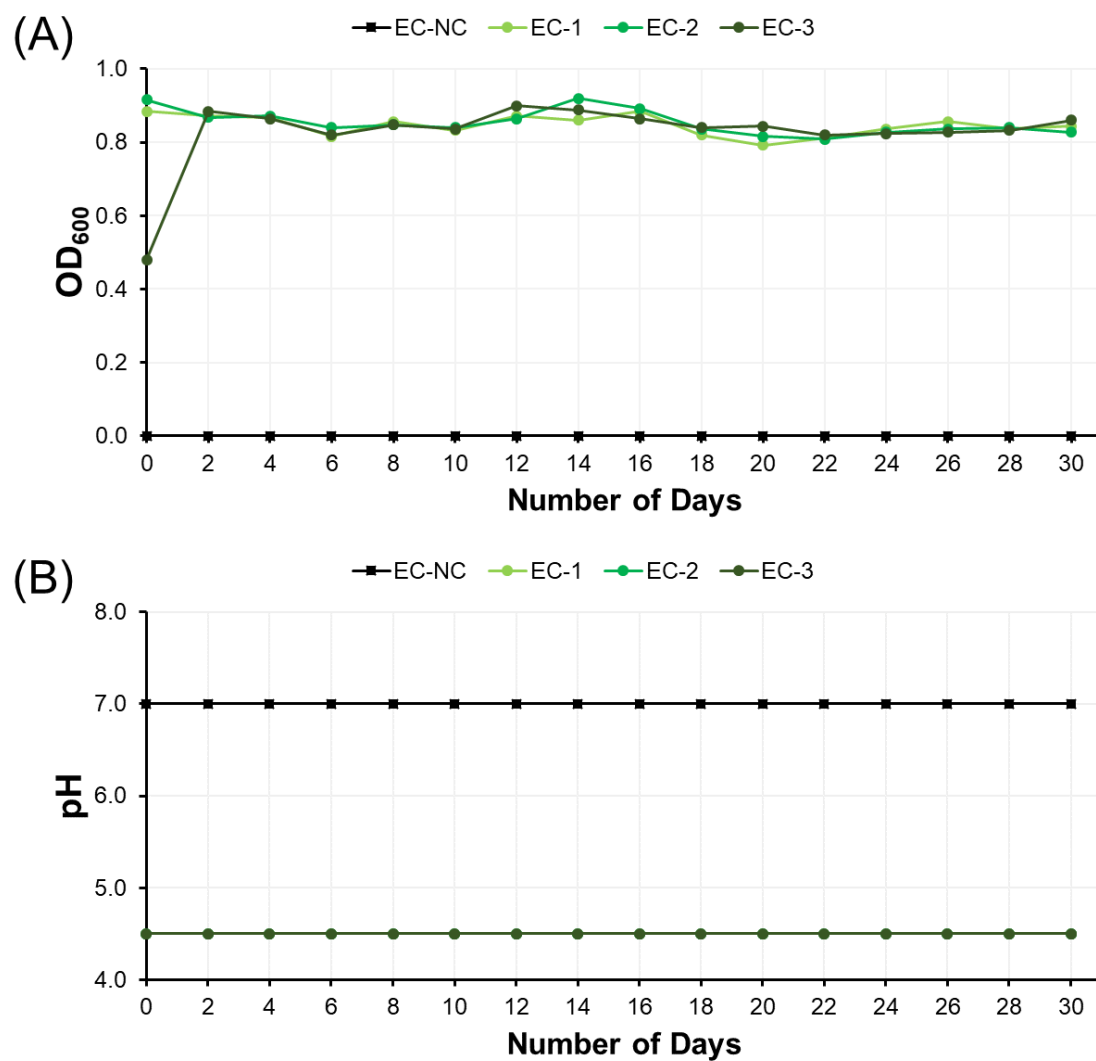

Figure S5. (A) Optical density reading at 600 nm wavelength and (B) pH of negative control (EC-NC) and ZrO<sub>2</sub> dental implants (EC-1, EC-2, EC-3) immersed in early-colonizing *Streptococcus* polyculture under 5% CO<sub>2</sub> for 30 days at 37 °C.

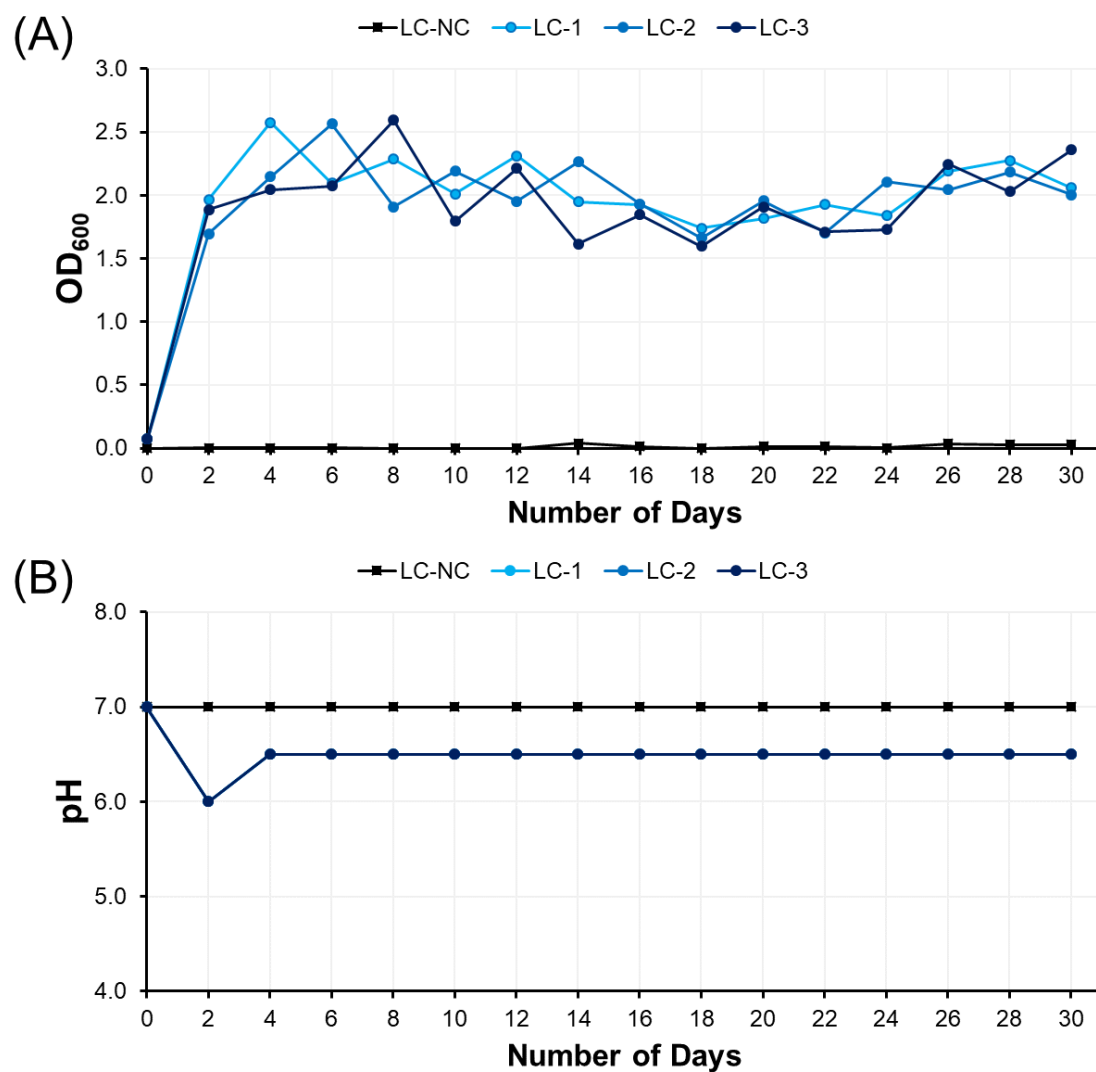

Figure S6. (A) Optical density reading at 600 nm wavelength and (B) pH of negative control (LC-NC) and ZrO<sub>2</sub> dental implants (LC-1, LC-2, LC-3) immersed in late-colonizing polyculture of *P. gingivalis* and *A. actinomycetemcomitans* under anaerobic atmosphere for 30 days at 37 °C.
